# Supplementary material for: Functional expression and purification of DoxA, a key cytochrome P450 from Streptomyces peucetius ATCC 27952
Source: PeerJ. 2022 Nov 16;10:e14373. doi: 10.7717/peerj.14373 (PMC9675340; doi:10.7717/peerj.14373)
Supplement: Supplemental Information 1 [file peerj-10-14373-s001.xlsx]

## Sheet: 22bA
nm	Oxidized form of DoxA from 22bA/RIL	CO-bound form of DoxA from 22bA/RIL
400	0.1483	-0.0017
401	0.1555	0.0022
402	0.1713	0.0132
403	0.1842	0.0234
404	0.1988	0.0366
405	0.2119	0.0492
406	0.2248	0.065
408	0.2435	0.094
410	0.2586	0.1221
411	0.263	0.1356
412	0.2655	0.1463
413	0.2641	0.158
414	0.2618	0.1677
415	0.2522	0.1692
416	0.2435	0.1705
417	0.2322	0.1679
418	0.2214	0.1631
419	0.206	0.1514
420	0.189	0.1378
421	0.1741	0.124
422	0.1543	0.1069
423	0.1351	0.0894
424	0.1197	0.073
425	0.1002	0.0553
426	0.0841	0.0387
427	0.0662	0.0202
428	0.0519	0.005
429	0.0341	-0.0128
430	0.0202	-0.0277
431	0.0082	-0.0403
432	-0.006	-0.0562
433	-0.0166	-0.0685
434	-0.0272	-0.0806
435	-0.0363	-0.0919
436	-0.0463	-0.1032
437	-0.0541	-0.1123
438	-0.0619	-0.1218
439	-0.0694	-0.1303
440	-0.0753	-0.1376
441	-0.0812	-0.1455
442	-0.0872	-0.1522
443	-0.0916	-0.1581
444	-0.0964	-0.1635
445	-0.1013	-0.1686
446	-0.1047	-0.173
447	-0.1087	-0.1775
448	-0.1131	-0.1816
449	-0.1165	-0.1846
450	-0.1202	-0.1884
451	-0.1232	-0.1913
452	-0.1259	-0.1942
453	-0.1286	-0.197
454	-0.1318	-0.2002
455	-0.1338	-0.2023
456	-0.1357	-0.2042
457	-0.1385	-0.2072
458	-0.1399	-0.2088
459	-0.1416	-0.2109
460	-0.1433	-0.2128
461	-0.1444	-0.2141
462	-0.1462	-0.2158
463	-0.1478	-0.2171
464	-0.1486	-0.218
465	-0.1495	-0.2181
466	-0.1508	-0.2184
467	-0.1513	-0.2184
468	-0.1528	-0.219
469	-0.1534	-0.2187
470	-0.1542	-0.2189
471	-0.155	-0.2186
472	-0.1554	-0.2182
473	-0.156	-0.2182
474	-0.1559	-0.2177
475	-0.1561	-0.217
476	-0.156	-0.2166
477	-0.1563	-0.2164
478	-0.1565	-0.2158
479	-0.1566	-0.2154
480	-0.1569	-0.2149
481	-0.1571	-0.2141
482	-0.1572	-0.2133
483	-0.1576	-0.2127
484	-0.1577	-0.2116
485	-0.1582	-0.2108
486	-0.1577	-0.2095
487	-0.1575	-0.2083
488	-0.1576	-0.2071
489	-0.1576	-0.2059
490	-0.1574	-0.2046
491	-0.1573	-0.2035
492	-0.1574	-0.2019
493	-0.157	-0.2005
494	-0.1565	-0.199
495	-0.156	-0.1979
496	-0.1552	-0.1963
497	-0.1548	-0.1948
498	-0.1542	-0.1933
499	-0.1536	-0.1916
500	-0.1533	-0.1903

## Sheet: 28aA
nm	Oxidized form of DoxA from 28aA/RIL	CO-bound form of DoxA from 28aA/RIL
400	0.2517	0.2258
401	0.2531	0.2252
402	0.2546	0.2253
403	0.2561	0.2263
404	0.258	0.2279
405	0.26	0.2275
406	0.2598	0.2283
407	0.2623	0.2313
408	0.2631	0.2308
409	0.2652	0.2338
410	0.2661	0.2351
411	0.267	0.237
412	0.2685	0.2388
413	0.2677	0.2403
414	0.2669	0.2412
415	0.2653	0.2426
416	0.2639	0.2434
417	0.2611	0.2429
418	0.2585	0.243
419	0.2555	0.2422
420	0.2516	0.2407
421	0.2471	0.2389
422	0.2422	0.2358
423	0.2379	0.2327
424	0.2323	0.2284
425	0.2265	0.2233
426	0.2203	0.2173
427	0.2148	0.211
428	0.2088	0.2045
429	0.2028	0.1979
430	0.1977	0.1915
431	0.192	0.1846
432	0.1875	0.1797
433	0.1827	0.1739
434	0.1783	0.1694
435	0.175	0.1653
436	0.1716	0.1614
437	0.1682	0.1578
438	0.1653	0.1544
439	0.1631	0.1519
440	0.1603	0.1487
441	0.158	0.146
442	0.1562	0.1436
443	0.1542	0.1412
444	0.1523	0.1391
445	0.1504	0.137
446	0.1488	0.1349
447	0.1468	0.1329
448	0.1452	0.1314
449	0.1436	0.1296
450	0.1417	0.1277
451	0.1404	0.1263
452	0.1387	0.1248
453	0.1373	0.1229
454	0.136	0.1217
455	0.1343	0.12
456	0.1328	0.1185
457	0.1314	0.1174
458	0.1301	0.1159
459	0.1286	0.1145
460	0.1276	0.1135
461	0.1263	0.1121
462	0.1252	0.1109
463	0.1242	0.1101
464	0.1232	0.109
465	0.1218	0.1078
466	0.1207	0.107
467	0.1195	0.1059
468	0.1184	0.1049
469	0.1174	0.104
470	0.1165	0.1033
471	0.1157	0.1024
472	0.1149	0.1018
473	0.114	0.1009
474	0.1131	0.1
475	0.1121	0.0992
476	0.1113	0.0985
477	0.1104	0.0976
478	0.1096	0.097
479	0.1087	0.0964
480	0.1077	0.0956
481	0.1071	0.095
482	0.1062	0.0943
483	0.1052	0.0935
484	0.1045	0.0928
485	0.1035	0.092
486	0.1028	0.0914
487	0.102	0.0907
488	0.1012	0.0901
489	0.1005	0.0894
490	0.0998	0.0887
491	0.099	0.0881
492	0.0981	0.0874
493	0.0974	0.0867
494	0.0967	0.0861
495	0.0958	0.0853
496	0.0951	0.0848
497	0.0943	0.0843
498	0.0937	0.0838
499	0.093	0.0833
500	0.0925	0.0828

## Sheet: pEAX1
nm	Oxidized form of DoxA from pEAX1/RIL	CO-bound form of DoxA from pEAX1/RIL
400	0.1996	0.1745
401	0.1998	0.1739
402	0.2013	0.1734
403	0.2022	0.1733
404	0.2027	0.1736
405	0.2032	0.1732
406	0.2051	0.1735
407	0.2071	0.1748
408	0.2096	0.1765
409	0.2108	0.179
410	0.2129	0.1808
411	0.2152	0.1841
412	0.2178	0.1863
413	0.2192	0.1879
414	0.2209	0.1872
415	0.2237	0.1905
416	0.2245	0.1921
417	0.2251	0.194
418	0.2247	0.1957
419	0.2239	0.1966
420	0.2226	0.1974
421	0.2199	0.1973
422	0.2174	0.1966
423	0.2139	0.1951
424	0.2089	0.1929
425	0.2039	0.1898
426	0.198	0.1861
427	0.1919	0.1819
428	0.1853	0.1778
429	0.1795	0.1739
430	0.1736	0.1702
431	0.1677	0.1668
432	0.1628	0.1643
433	0.1577	0.1618
434	0.1537	0.1605
435	0.1503	0.1594
436	0.1466	0.1585
437	0.1435	0.158
438	0.1398	0.1576
439	0.1374	0.1577
440	0.1346	0.1574
441	0.1321	0.1573
442	0.1298	0.1572
443	0.1277	0.1571
444	0.1258	0.1566
445	0.1239	0.1558
446	0.1223	0.1547
447	0.1203	0.1527
448	0.1185	0.1506
449	0.1164	0.1474
450	0.1146	0.1442
451	0.1129	0.1407
452	0.1108	0.136
453	0.109	0.1318
454	0.1071	0.1274
455	0.1055	0.1231
456	0.1035	0.1187
457	0.1019	0.1149
458	0.1004	0.111
459	0.0989	0.1076
460	0.0977	0.1047
461	0.0961	0.1019
462	0.0948	0.0994
463	0.0937	0.0974
464	0.0928	0.0955
465	0.0918	0.0938
466	0.091	0.0923
467	0.0899	0.0906
468	0.0891	0.0892
469	0.0884	0.0881
470	0.0875	0.0869
471	0.0867	0.0857
472	0.0859	0.0849
473	0.0852	0.0837
474	0.0845	0.0829
475	0.0837	0.082
476	0.0832	0.081
477	0.0824	0.08
478	0.0817	0.0793
479	0.081	0.0787
480	0.0803	0.0778
481	0.0796	0.0772
482	0.079	0.0766
483	0.0783	0.0757
484	0.0778	0.0752
485	0.0772	0.0745
486	0.0766	0.0739
487	0.0761	0.0734
488	0.0755	0.0728
489	0.0748	0.0722
490	0.0743	0.0717
491	0.0737	0.0711
492	0.0732	0.0705
493	0.0726	0.0698
494	0.072	0.0692
495	0.0716	0.0687
496	0.0712	0.0683
497	0.0707	0.0677
498	0.0702	0.0672
499	0.0696	0.0668
500	0.069	0.0664

## Sheet: AX1R2
nm	Oxidized form of DoxA from AX1R2/RIL	CO-bound form of DoxA from AX1R2/RIL
400	0.7291	0.1889
401	0.7657	0.1892
402	0.7986	0.1916
403	0.8311	0.1934
404	0.8722	0.1974
405	0.9134	0.2027
406	0.9491	0.2099
407	0.9973	0.2188
408	1.0363	0.2284
409	1.0717	0.238
410	1.1064	0.2522
411	1.1398	0.2666
412	1.17	0.2827
413	1.1967	0.2988
414	1.2112	0.3164
415	1.2102	0.3306
416	1.2079	0.3484
417	1.1963	0.3663
418	1.174	0.3786
419	1.1429	0.3899
420	1.1067	0.3992
421	1.062	0.4046
422	1.0111	0.4095
423	0.9583	0.4128
424	0.9105	0.4162
425	0.8525	0.421
426	0.801	0.4278
427	0.748	0.4367
428	0.7013	0.4485
429	0.6494	0.4662
430	0.6087	0.4837
431	0.57	0.5051
432	0.5277	0.5369
433	0.4949	0.5657
434	0.4617	0.6022
435	0.4319	0.6432
436	0.405	0.6867
437	0.3825	0.7295
438	0.3597	0.7804
439	0.3391	0.8327
440	0.3226	0.8792
441	0.3036	0.9398
442	0.2898	0.9875
443	0.2759	1.0336
444	0.2629	1.0768
445	0.2512	1.1089
446	0.2406	1.1291
447	0.23	1.1421
448	0.2199	1.1376
449	0.2124	1.1228
450	0.2033	1.0868
451	0.1954	1.0411
452	0.1884	0.9878
454	0.1752	0.851
455	0.1692	0.7823
456	0.1637	0.7126
457	0.1578	0.6337
458	0.1537	0.5776
459	0.1491	0.5166
460	0.1446	0.4607
461	0.1406	0.4157
462	0.1375	0.3767
463	0.1339	0.3369
464	0.1316	0.31
465	0.1291	0.2819
466	0.1267	0.2588
467	0.1248	0.2406
468	0.1228	0.2233
469	0.1214	0.2085
470	0.1195	0.1949
471	0.1182	0.1845
472	0.1167	0.1738
473	0.1156	0.1658
474	0.1143	0.158
475	0.1138	0.1513
476	0.1146	0.1451
477	0.1167	0.1402
478	0.1192	0.135
479	0.1211	0.131
480	0.1225	0.1272
481	0.1229	0.124
482	0.1223	0.1208
483	0.1213	0.1183
484	0.1197	0.1154
485	0.1185	0.1134
486	0.1174	0.1112
487	0.1162	0.1093
488	0.1149	0.1074
489	0.114	0.1058
490	0.1129	0.1044
491	0.1115	0.103
492	0.1096	0.1018
493	0.1085	0.1008
494	0.1071	0.1002
495	0.106	0.0996
496	0.105	0.099
497	0.1042	0.0984
498	0.1036	0.098
499	0.1035	0.098
500	0.1036	0.0978
