# Supplementary material for: Functional expression and purification of DoxA, a key cytochrome P450 from Streptomyces peucetius ATCC 27952
Source: PeerJ. 2022 Nov 16;10:e14373. doi: 10.7717/peerj.14373 (PMC9675340; doi:10.7717/peerj.14373)
Supplement: Supplemental Information 2 [file peerj-10-14373-s002.xlsx]

## Sheet: Sheet1
nm	DoxA from pEA/RIL	DoxA from pEAX1/RIL	DoxA from AX1R2/RIL	DoxA from 28aA/RIL	DoxA from 22bA/RIL
500	0.0072	0.0086	0.0173	0.009	0.0026
501	0.0073	0.0086	0.0177	0.0092	0.0028
502	0.0076	0.0089	0.0179	0.0094	0.0029
503	0.0077	0.0091	0.0182	0.0095	0.003
504	0.0081	0.0094	0.0189	0.01	0.0032
505	0.0084	0.0099	0.0195	0.0102	0.0032
506	0.0087	0.0103	0.0204	0.0106	0.0033
507	0.0091	0.0107	0.0215	0.0114	0.0037
508	0.0095	0.0112	0.0226	0.0119	0.0039
509	0.0099	0.0117	0.0238	0.0123	0.0042
510	0.0104	0.0121	0.0247	0.0129	0.0043
511	0.0107	0.0126	0.026	0.0136	0.0045
512	0.0111	0.0128	0.0272	0.0141	0.0049
513	0.0113	0.0132	0.0283	0.0146	0.0052
514	0.0117	0.0136	0.0292	0.0151	0.0052
515	0.0119	0.014	0.0303	0.0154	0.0053
516	0.0122	0.0144	0.0312	0.0158	0.0054
517	0.0126	0.0147	0.0322	0.0164	0.0056
518	0.013	0.0152	0.0333	0.0169	0.0057
519	0.0132	0.0155	0.0341	0.0173	0.0058
520	0.0135	0.0159	0.035	0.0176	0.0055
521	0.0136	0.0162	0.036	0.0181	0.0057
522	0.0136	0.0161	0.0367	0.0184	0.0059
523	0.0133	0.0158	0.0364	0.0183	0.0057
524	0.0129	0.0154	0.036	0.018	0.0055
525	0.0123	0.0146	0.0351	0.0176	0.0052
526	0.0116	0.014	0.0337	0.017	0.0049
527	0.0109	0.0132	0.032	0.0161	0.0046
528	0.0102	0.0123	0.0301	0.0152	0.004
529	0.0097	0.0117	0.0284	0.0143	0.0039
530	0.0092	0.0113	0.0268	0.0138	0.0036
531	0.0088	0.0108	0.0252	0.013	0.0032
532	0.0083	0.0101	0.024	0.0124	0.003
533	0.0081	0.0099	0.0226	0.0118	0.0027
534	0.0077	0.0094	0.0216	0.0111	0.0025
535	0.0076	0.0092	0.021	0.0109	0.0025
536	0.0075	0.0091	0.0204	0.0108	0.0025
537	0.0076	0.0092	0.0202	0.0107	0.0024
538	0.0078	0.0093	0.0203	0.0106	0.0022
539	0.0081	0.0097	0.021	0.011	0.0025
540	0.0085	0.0101	0.0218	0.0115	0.0027
541	0.0092	0.011	0.0232	0.012	0.0029
542	0.0099	0.0119	0.0251	0.0133	0.0033
543	0.011	0.0131	0.0272	0.0144	0.0036
544	0.0122	0.0145	0.0297	0.0156	0.0041
545	0.0137	0.0161	0.0335	0.0173	0.0043
546	0.0155	0.0182	0.0377	0.0195	0.0052
547	0.0179	0.0209	0.0423	0.0218	0.0059
548	0.0202	0.0234	0.0488	0.0248	0.0067
549	0.0224	0.0261	0.0546	0.0277	0.0076
550	0.0245	0.0285	0.0613	0.0308	0.0085
551	0.0259	0.0303	0.0679	0.0337	0.0093
552	0.0269	0.0315	0.0722	0.0356	0.0099
553	0.0269	0.0315	0.0754	0.0369	0.0103
554	0.0266	0.0312	0.0765	0.0373	0.0104
555	0.026	0.0306	0.0758	0.037	0.0103
556	0.0229	0.0273	0.0728	0.0362	0.0101
557	0.0204	0.0246	0.0676	0.0337	0.0093
558	0.018	0.0218	0.0612	0.0309	0.0087
559	0.0151	0.0185	0.0544	0.0281	0.0079
560	0.0126	0.0154	0.046	0.0241	0.0069
561	0.0105	0.013	0.0389	0.0208	0.0064
562	0.0084	0.0106	0.0325	0.0175	0.0056
563	0.0069	0.0088	0.0265	0.0143	0.0054
564	0.0056	0.0073	0.0219	0.0118	0.0051
565	0.0044	0.0059	0.0184	0.0098	0.0047
566	0.0037	0.005	0.0151	0.008	0.0048
567	0.0032	0.0043	0.0127	0.0068	0.0048
568	0.0026	0.0034	0.0108	0.0058	0.0048
569	0.0022	0.003	0.0094	0.0049	0.0047
570	0.0017	0.0023	0.0082	0.0042	0.0047
571	0.0015	0.0021	0.007	0.0037	0.0044
572	0.0014	0.002	0.006	0.0031	0.0041
573	0.0012	0.0018	0.0053	0.0026	0.004
574	0.001	0.0016	0.0049	0.0025	0.0044
575	0.001	0.0015	0.0042	0.0022	0.0043
576	0.0009	0.0014	0.0038	0.0019	0.004
577	0.0008	0.0013	0.0035	0.002	0.0038
578	0.0007	0.0012	0.0033	0.0022	0.0039
579	0.0007	0.0012	0.003	0.0024	0.0037
580	0.0006	0.0012	0.0026	0.0024	0.0033
581	0.0007	0.001	0.0026	0.0025	0.0033
582	0.0006	0.0011	0.0024	0.0027	0.0032
583	0.0007	0.001	0.0023	0.0031	0.0033
584	0.0007	0.001	0.0021	0.003	0.003
585	0.0006	0.001	0.0021	0.003	0.0027
586	0.0006	0.001	0.0019	0.0032	0.0026
587	0.0007	0.0011	0.0018	0.0031	0.0025
588	0.0007	0.001	0.0015	0.0031	0.0023
589	0.0007	0.0009	0.0013	0.0028	0.002
590	0.0006	0.0009	0.0011	0.0025	0.0017
591	0.0006	0.0009	0.0011	0.0024	0.0017
592	0.0006	0.0008	0.0009	0.0022	0.0014
593	0.0005	0.0007	0.0009	0.0021	0.0012
594	0.0006	0.0007	0.001	0.0021	0.0013
595	0.0006	0.0008	0.0009	0.0019	0.001
596	0.0006	0.0007	0.0009	0.0018	0.0008
597	0.0005	0.0006	0.0009	0.002	0.0011
598	0.0006	0.0006	0.0009	0.0018	0.0008
599	0.0006	0.0006	0.0009	0.0017	0.0005
600	0.0006	0.0006	0.0009	0.0018	0.0006
